# Supplementary material for: Sunlight induced cycloaddition and host–guest property of self-assembled organometallic macrocycles based on a versatile building block
Source: Royal Society of Chemistry journal article supplement (doi:10.1039/c2cc30630a), 2012-01-01
Supplement: c2cc30630a.pdf [file c2cc30630a.pdf]

Supplementary Material (ESI) for Chemical Communications  
This journal is (c) The Royal Society of Chemistry 2012

## Supporting Information for

### **Sunlight induced photocycloaddition and host-guest property of self-assembled organometallic macrocycles based on a versatile building block**

Tong Wu, and Guo-Xin Jin\*

*Shanghai Key Laboratory of Molecular Catalysis and Innovative Material, Department of Chemistry,*

*Fudan University, Shanghai, 200433, P. R. China.*

*E-mail: [gxjin@fudan.edu.cn](mailto:gxjin@fudan.edu.cn)*

Table 1. Crystal data and structure refinement of **1–4**

|                                                                                                                 | <b>1</b>                                                                                                                         | <b>2</b>                                                                                                         | <b>3</b>                                                                                                         | <b>4</b>                                                                                                         |
|-----------------------------------------------------------------------------------------------------------------|----------------------------------------------------------------------------------------------------------------------------------|------------------------------------------------------------------------------------------------------------------|------------------------------------------------------------------------------------------------------------------|------------------------------------------------------------------------------------------------------------------|
| Formula                                                                                                         | C <sub>106</sub> H <sub>120</sub> C <sub>14</sub> F <sub>12</sub> Ir <sub>4</sub> N <sub>12</sub> O <sub>14</sub> S <sub>4</sub> | C <sub>100</sub> H <sub>112</sub> F <sub>12</sub> Ir <sub>4</sub> N <sub>12</sub> O <sub>16</sub> S <sub>4</sub> | C <sub>146</sub> H <sub>154</sub> F <sub>18</sub> Ir <sub>6</sub> N <sub>24</sub> O <sub>24</sub> S <sub>6</sub> | C <sub>186</sub> H <sub>180</sub> F <sub>18</sub> Ir <sub>6</sub> N <sub>24</sub> O <sub>24</sub> S <sub>6</sub> |
| F <sub>w</sub>                                                                                                  | 3052.98                                                                                                                          | 2863.06                                                                                                          | 4316.49                                                                                                          | 4823.10                                                                                                          |
| Crystal system                                                                                                  | Monoclinic                                                                                                                       | Monoclinic                                                                                                       | Monoclinic                                                                                                       | Monoclinic                                                                                                       |
| space group                                                                                                     | C2/c                                                                                                                             | P2(1)/c                                                                                                          | P2(1)/c                                                                                                          | P2(1)/c                                                                                                          |
| <i>a</i> (Å)                                                                                                    | 38.315(4)                                                                                                                        | 13.0767(9)                                                                                                       | 20.861(3)                                                                                                        | 30.302(3)                                                                                                        |
| <i>b</i> (Å)                                                                                                    | 14.4214(14)                                                                                                                      | 23.9320(17)                                                                                                      | 33.223(5)                                                                                                        | 30.302(3)                                                                                                        |
| <i>c</i> (Å)                                                                                                    | 22.307(2)                                                                                                                        | 18.5594(14)                                                                                                      | 28.731(4)                                                                                                        | 41.215(4)                                                                                                        |
| $\alpha$ (°)                                                                                                    | 90                                                                                                                               | 90                                                                                                               | 90                                                                                                               | 90                                                                                                               |
| $\beta$ (°)                                                                                                     | 104.0090(10)                                                                                                                     | 98.0130(10)                                                                                                      | 107.195(2)                                                                                                       | 90                                                                                                               |
| $\gamma$ (°)                                                                                                    | 90                                                                                                                               | 90                                                                                                               | 90                                                                                                               | 120                                                                                                              |
| V (Å <sup>3</sup> )                                                                                             | 11959(2)                                                                                                                         | 5751.5(7)                                                                                                        | 19022(4)                                                                                                         | 32774(6)                                                                                                         |
| <i>Z</i>                                                                                                        | 4                                                                                                                                | 2                                                                                                                | 4                                                                                                                | 6                                                                                                                |
| <i>D</i> <sub>c</sub> (Mg / m <sup>3</sup> )                                                                    | 1.696                                                                                                                            | 1.653                                                                                                            | 1.507                                                                                                            | 1.466                                                                                                            |
| $\mu$ (Mo-K $\alpha$ )(mm <sup>-1</sup> )                                                                       | 4.677                                                                                                                            | 4.768                                                                                                            | 4.326                                                                                                            | 3.775                                                                                                            |
| <i>F</i> (000)                                                                                                  | 6000                                                                                                                             | 2808                                                                                                             | 8440                                                                                                             | 14256                                                                                                            |
| $\theta$ range (°)                                                                                              | 1.10~27.01                                                                                                                       | 1.40~27.81                                                                                                       | 0.96~25.01                                                                                                       | 0.92~27.59                                                                                                       |
| Limiting indices (hkl)                                                                                          | -48, 32; -17, 18; -28, 26                                                                                                        | -17, 17; -31, 31; -16, 24                                                                                        | -24, 23; -39, 39; -34, 34                                                                                        | -39,39; -39,36; -53,39                                                                                           |
| Reflections collected                                                                                           | 33546                                                                                                                            | 42266                                                                                                            | 103769                                                                                                           | 80769                                                                                                            |
| Independent reflections                                                                                         | 12890                                                                                                                            | 13510                                                                                                            | 32977                                                                                                            | 16790                                                                                                            |
| <i>R</i> <sub>int</sub>                                                                                         | 0.0568                                                                                                                           | 0.0281                                                                                                           | 0.0782                                                                                                           | 0.0727                                                                                                           |
| Completeness to $\theta$ (°)                                                                                    | 98.7 %                                                                                                                           | 99.1 %                                                                                                           | 98.3 %                                                                                                           | 99.4 %                                                                                                           |
| Data / restraints / parameters                                                                                  | 12890 / 40 / 683                                                                                                                 | 13510 / 49 / 714                                                                                                 | 32977/ 254 / 1515                                                                                                | 16790 / 21 / 778                                                                                                 |
| Goodness-of-fit on <i>F</i> <sup>2</sup>                                                                        | 1.044                                                                                                                            | 1.087                                                                                                            | 0.974                                                                                                            | 0.990                                                                                                            |
| <i>R</i> <sub>1</sub> <sup>a</sup> , w <i>R</i> <sub>2</sub> <sup>a</sup> [ <i>I</i> > 2 $\sigma$ ( <i>I</i> )] | 0.0605, 0.1572                                                                                                                   | 0.0395, 0.1121                                                                                                   | 0.0936, 0.2510                                                                                                   | 0.0643, 0.1708                                                                                                   |
| <i>R</i> <sub>1</sub> , w <i>R</i> <sub>2</sub> (all data)                                                      | 0.1025, 0.1740                                                                                                                   | 0.0533, 0.1192                                                                                                   | 0.1535, 0.2840                                                                                                   | 0.1007, 0.1938                                                                                                   |

In complexes **1**, **2**, **3**, **4**, there are disorder solvents (in **3**, triflate anions are also disordered) in the asymmetric units and the SQUEEZE algorithm was used to omit them. In complex **3**, one of six pentamethylcyclopentadienyl ligands in the cation were disordered and it was refined to two idealized positions (53:47); C3, C4, C89, C99, C100, C109, C110, C111, C119, C124, C130, C130, C135, C136, O4 and O5 were refined isotropically because of non-positive definition and other non-hydrogen atoms were refined anisotropically. In complex **4**, C48, C61, C62, O7 and O8 were also refined isotropically because of non-positive definition and other non-hydrogen atoms were refined anisotropically. In complex **2**, two of four triflate anions in the asymmetric unit were disordered and it was refined to two idealized positions (57:43). In complex **1**, C48, C50 -53 and O7 were refined isotropically because of non-positive definition and other non-hydrogen atoms were refined anisotropically. In all complexes, hydrogen atoms were placed in the geometrically calculated positions with fixed isotropic thermal parameters. However, hydrogen atoms of the solvent water and methanol molecules could not be found.

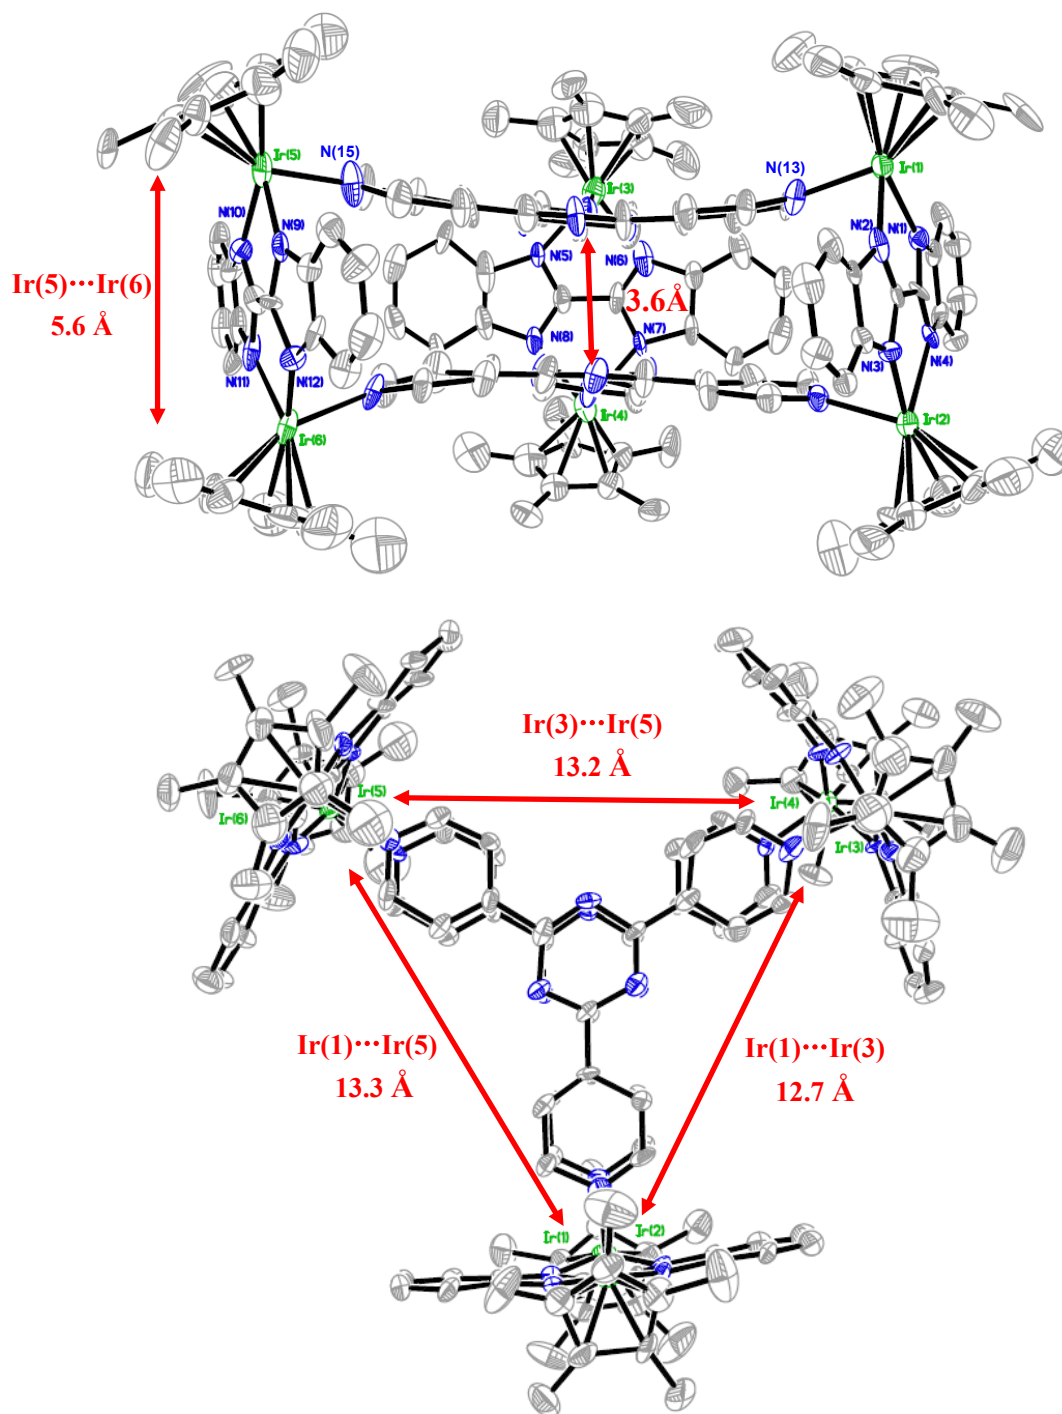

Figure S1. Cation structure of **3** with thermal ellipsoids drawn at the 30% level. Hydrogen atoms are omitted for clarity. Selected distances (Å) and angles (°): Ir(1)-N(1) 2.174(11), Ir(1)-N(2) 2.125(12), Ir(1)-N(13) 2.129(13), N(1)-Ir(1)-N(2) 77.4(5), N(1)-Ir(1)-N(13) 84.8(5), N(2)-Ir(1)-N(13) 85.6(5). The centre to centre of triazine is 3.6 Å.

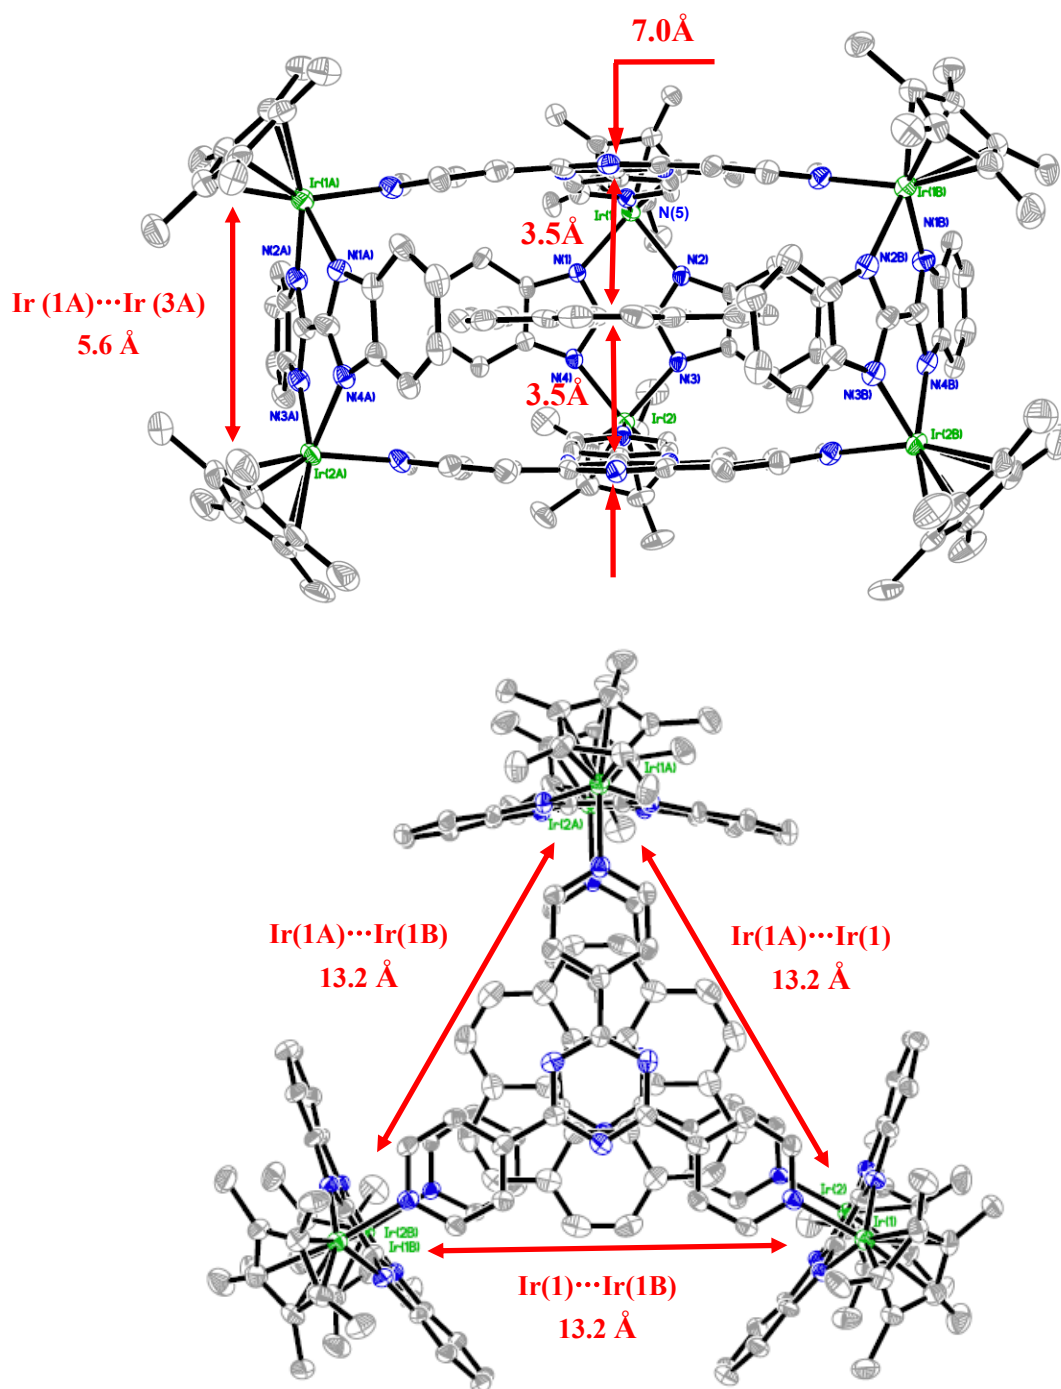

Figure S2. Cation structure of 4 with thermal ellipsoids drawn at the 30% level. Hydrogen atoms are omitted for clarity. Selected distances (Å) and angles (°): Ir(1)-N(1) 2.163(6), Ir(1)-N(2) 2.186(7), Ir(1)-N(5) 2.108(6), N(1)-Ir(1)-N(2) 78.6(2), N(5)-Ir(1)-N(1) 87.9(2), N(5)-Ir(1)-N(2) 88.4(2). The centre to centre of triazine is 7.0 Å

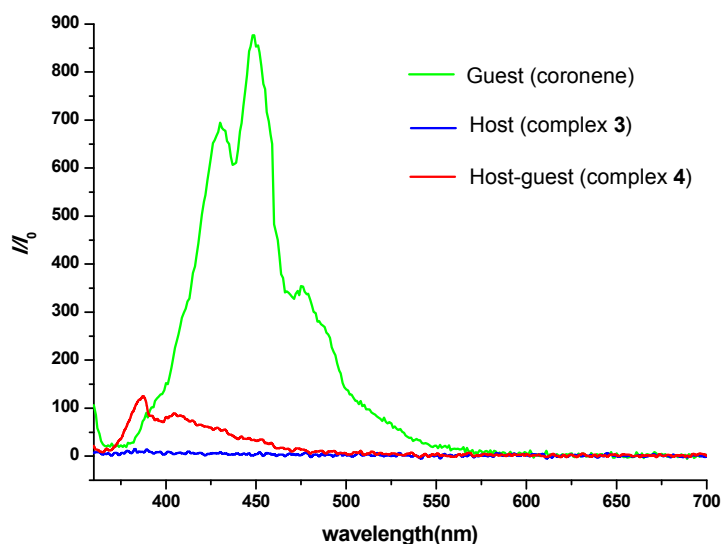

Figure S3. Fluorescence emission spectra of  $[\mathbf{3}]^{6+}$  and  $[\text{coronene} \subset \mathbf{3}]^{6+}$  as solution ( $10^{-5}\text{M}$ ) in methanol and coronene as solution ( $10^{-5}\text{M}$ ) in toluene. Excitation at 350 nm. All solvents have no effect on the results.

Fluorescence emission spectra showed us that the polyaromatic compounds with strong fluorescence can be quenched after being encapsulated by complex **3** when the excitation was at 350 nm.
